# Supplementary material for: Prognostic Inflammatory Index Based on Preoperative Peripheral Blood for Predicting the Prognosis of Colorectal Cancer Patients
Source: PubMed Central journal article supplement (PMC7792597; doi:10.3390/cancers13010003), 2020-12-22
Supplement: cancers-13-00003-s001.pdf [file cancers-13-00003-s001.pdf]

**Table S1.** The prognostic effects of six types of preoperative blood cell count for patients with colorectal cancer in the training cohort.

| Variables                       | Univariate Analysis <sup>a</sup> |                     |                | Multivariate Analysis <sup>b</sup> |                     |                |
|---------------------------------|----------------------------------|---------------------|----------------|------------------------------------|---------------------|----------------|
|                                 | $\beta$                          | HR (95% CI)         | <i>p</i> Value | $\beta$                            | HR (95% CI)         | <i>p</i> Value |
| Overall Survival                |                                  |                     |                |                                    |                     |                |
| Platelet (10 <sup>9</sup> /L)   |                                  |                     |                |                                    |                     |                |
| >178                            | -                                | 1.000               | -              | -                                  | 1.000               | -              |
| ≤178                            | 0.1514                           | 1.163 (0.996–1.359) | 0.057          | 0.1878                             | 1.207 (1.029–1.414) | 0.020          |
| Lymphocyte (10 <sup>9</sup> /L) |                                  |                     |                |                                    |                     |                |
| >1.34                           | -                                | 1.000               | -              | -                                  | 1.000               | -              |
| ≤1.34                           | 0.1846                           | 1.203 (1.047–1.381) | 0.009          | 0.1370                             | 1.147 (0.993–1.324) | 0.062          |
| Neutrophil (10 <sup>9</sup> /L) | 0.0508                           | 1.052 (1.023–1.083) | <0.001         | 0.0251                             | 1.025 (0.992–1.060) | 0.138          |
| Monocyte (10 <sup>9</sup> /L)   | 0.5172                           | 1.677 (1.294–2.174) | <0.001         | 0.4570                             | 1.579 (1.175–2.124) | 0.002          |
| Eosinophil (10 <sup>9</sup> /L) |                                  |                     |                |                                    |                     |                |
| >0.04                           | -                                | 1.000               | -              | -                                  | 1.000               | -              |
| ≤0.04                           | 0.2451                           | 1.278 (1.114–1.466) | <0.001         | 0.2094                             | 1.233 (1.070–1.421) | 0.004          |
| Basophil (10 <sup>9</sup> /L)   | -0.6651                          | 0.514 (0.085–3.104) | 0.468          | -                                  | -                   | -              |
| Disease-free Survival           |                                  |                     |                |                                    |                     |                |
| Platelet (10 <sup>9</sup> /L)   |                                  |                     |                |                                    |                     |                |
| >185                            | -                                | 1.00                | -              | -                                  | 1.00                | -              |
| ≤185                            | 0.1956                           | 1.216 (1.039–1.424) | 0.015          | 0.2370                             | 1.267 (1.079–1.489) | 0.004          |
| Lymphocyte (10 <sup>9</sup> /L) | -0.0191                          | 0.981 (0.896–1.075) | 0.682          | -                                  | -                   | -              |
| Neutrophil (10 <sup>9</sup> /L) | 0.0480                           | 1.049(1.016–1.083)  | 0.003          | 0.0415                             | 1.042 (1.004–1.082) | 0.028          |
| Monocyte (10 <sup>9</sup> /L)   | 0.3414                           | 1.407 (1.042–1.900) | 0.026          | 0.2600                             | 1.297 (0.917–1.835) | 0.142          |
| Eosinophil (10 <sup>9</sup> /L) |                                  |                     |                |                                    |                     |                |
| >0.11                           | -                                | 1.00                | -              | -                                  | 1.00                | -              |
| ≤0.11                           | 0.2393                           | 1.270 (1.123–1.437) | <0.001         | 0.2437                             | 1.276 (1.127–1.445) | <0.001         |
| Basophil (10 <sup>9</sup> /L)   | -0.5663                          | 0.568 (0.075–4.318) | 0.584          | -                                  | -                   | -              |

<sup>a</sup>Univariate analyses were performed to investigate the association between the six types of blood cell counts and overall survival or disease-free survival. Blood cells whose statistical  $p < 0.10$  was defined as that associated with prognosis of colorectal cancer. <sup>b</sup> Significant prognostic factors ( $p < 0.10$ ) in the univariate analyses were entered into multivariate models. The HRs were obtained based on the mutual adjustment of different factors. Coefficients of the multivariate Cox model were used as the weights of blood cell counts for the construction of the prognostic inflammatory index. Abbreviations: HR, hazard ratio; CI, confidence interval.

**Table S2.** Association of OS-PII and DFS-PII with clinicopathological characteristics of colorectal cancer in the training cohort.

| Demographic or Characteristic | Case (%)    | OS-PII      |             | <i>p</i> Value | DFS-PII     |             | <i>p</i> Value |
|-------------------------------|-------------|-------------|-------------|----------------|-------------|-------------|----------------|
|                               |             | ≤4.27       | >4.27       |                | ≤4.47       | >4.47       |                |
| Age (year)                    |             |             |             | 0.001          |             |             | 0.174          |
| <60                           | 2103 (50.6) | 1411 (52.5) | 692 (47.2)  |                | 1080 (51.7) | 1023 (49.5) |                |
| ≥60                           | 2051 (49.4) | 1278 (47.5) | 773 (52.8)  |                | 1009 (48.3) | 1042 (50.5) |                |
| Gender                        |             |             |             | <0.001         |             |             | 0.920          |
| Male                          | 2454 (59.1) | 1522 (56.6) | 932 (63.6)  |                | 1232 (59.0) | 1222 (59.2) |                |
| Female                        | 1700 (40.9) | 1167 (43.4) | 533 (36.4)  |                | 857 (41.0)  | 843 (40.8)  |                |
| BMI (kg/m <sup>2</sup> )      |             |             |             | 0.016          |             |             | 0.201          |
| <24                           | 2390 (57.5) | 1516 (56.4) | 874 (59.7)  |                | 1188 (56.9) | 1202 (58.2) |                |
| ≥24                           | 1764 (42.5) | 1173 (43.6) | 591 (40.3)  |                | 901 (43.1)  | 863 (41.8)  |                |
| Hypertension                  |             |             |             | 0.033          |             |             | 0.139          |
| No                            | 3554 (85.6) | 2277 (84.7) | 1277 (87.2) |                | 1770 (84.7) | 1784 (86.4) |                |
| Yes                           | 600 (14.4)  | 412 (15.3)  | 188 (12.8)  |                | 319 (15.3)  | 281 (13.6)  |                |
| Diabetes mellitus             |             |             |             | 0.097          |             |             | 0.323          |
| No                            | 3842 (92.5) | 2501 (93.0) | 1341 (91.5) |                | 1941 (92.9) | 1901 (92.1) |                |
| Yes                           | 312 (7.5)   | 188 (7.0)   | 124 (8.5)   |                | 148 (7.1)   | 164 (7.9)   |                |
| Tumor location                |             |             |             | 0.001          |             |             | 0.548          |
| Colon                         | 1961 (47.2) | 1219 (45.3) | 742 (50.6)  |                | 976 (46.7)  | 985 (47.7)  |                |

|                                                       |             |             |             |        |             |             |       |
|-------------------------------------------------------|-------------|-------------|-------------|--------|-------------|-------------|-------|
| Rectum                                                | 2193 (52.8) | 1470 (54.7) | 723 (49.4)  |        | 1113 (53.3) | 1080 (52.3) |       |
| Tumor diameter                                        |             |             |             | 0.034  |             |             | 0.382 |
| <50 mm                                                | 1696 (40.8) | 1134 (42.2) | 563 (38.4)  |        | 871 (41.7)  | 825 (40.0)  |       |
| ≥50 mm                                                | 2458 (59.2) | 1555 (57.8) | 902 (61.6)  |        | 1218 (58.3) | 1240 (60.0) |       |
| Pathological classification                           |             |             |             | 0.492  |             |             | 0.871 |
| Prominence                                            | 2740 (66.0) | 1791 (66.6) | 949 (64.8)  |        | 1377 (65.9) | 1363 (66.0) |       |
| Infiltration or Ulceration                            | 428 (10.3)  | 271 (10.1)  | 157 (10.7)  |        | 211 (10.1)  | 217 (10.5)  |       |
| Infiltration and Ulceration                           | 986 (23.7)  | 627 (23.3)  | 359 (24.5)  |        | 501 (24.0)  | 485 (23.5)  |       |
| Differentiation degree                                |             |             |             | <0.001 |             |             | 0.012 |
| Well                                                  | 331 (8.0)   | 226 (8.4)   | 105 (7.2)   |        | 175 (8.4)   | 156 (7.6)   |       |
| Moderate                                              | 3225 (77.6) | 2124 (79.0) | 1101 (75.2) |        | 1646 (78.8) | 1579 (76.5) |       |
| Poor                                                  | 598 (14.4)  | 339 (12.6)  | 259 (17.6)  |        | 268 (12.8)  | 330 (15.9)  |       |
| Histologic classification                             |             |             |             | 0.851  |             |             | 0.281 |
| Adenocarcinoma                                        | 3136 (75.5) | 2033 (75.6) | 1103 (75.3) |        | 1592 (76.2) | 1544 (74.8) |       |
| Mucinous adenocarcinoma or signet ring cell carcinoma | 1018 (24.5) | 656 (24.4)  | 362 (24.7)  |        | 497 (23.8)  | 521 (25.2)  |       |
| TNM staging                                           |             |             |             | 0.062  |             |             | 1.000 |
| II                                                    | 2385 (57.4) | 1515 (56.3) | 870 (59.4)  |        | 1199 (57.4) | 1186 (57.4) |       |
| III                                                   | 1769 (42.6) | 1174 (43.7) | 595 (40.6)  |        | 890 (42.6)  | 879 (42.6)  |       |
| Tumor invasion                                        |             |             |             | 0.011  |             |             | 0.073 |
| T1–T3                                                 | 1847 (44.5) | 1235 (45.9) | 612 (41.8)  |        | 958 (45.9)  | 889 (43.1)  |       |
| T4                                                    | 2307 (55.5) | 1454 (54.1) | 853 (58.2)  |        | 1131 (54.1) | 1176 (56.9) |       |
| Cancer nodules                                        |             |             |             | 0.436  |             |             | 0.730 |
| No                                                    | 3863 (93.0) | 2449 (92.8) | 1404 (93.5) |        | 1946 (93.2) | 1917 (92.8) |       |
| Yes                                                   | 291 (7.0)   | 191 (7.2)   | 98 (6.5)    |        | 143 (6.8)   | 148 (7.2)   |       |
| Nerve invasion                                        |             |             |             | 0.840  |             |             | 0.224 |
| No                                                    | 3836 (92.3) | 2481 (92.3) | 1355 (92.5) |        | 1940 (92.9) | 1896 (91.8) |       |
| Yes                                                   | 318 (7.7)   | 208 (7.7)   | 110 (7.5)   |        | 149 (7.1)   | 169 (8.2)   |       |
| Vascular tumor thrombus                               |             |             |             | 0.440  |             |             | 0.810 |
| No                                                    | 4009 (96.5) | 2600 (96.7) | 1409 (96.2) |        | 2018 (96.6) | 1991 (96.4) |       |
| Yes                                                   | 145 (3.5)   | 89 (3.3)    | 56 (3.8)    |        | 71 (3.4)    | 74 (3.6)    |       |
| CEA                                                   |             |             |             | 0.377  |             |             | 0.947 |
| <5 ng/mL                                              | 2438 (58.7) | 1590 (59.1) | 848 (57.9)  |        | 1231 (58.9) | 1207 (58.5) |       |
| ≥5 ng/mL                                              | 1716 (41.3) | 1099 (40.9) | 617 (42.1)  |        | 858 (41.1)  | 858 (41.5)  |       |
| CA19-9                                                |             |             |             | <0.001 |             |             | 0.001 |
| <37 U/mL                                              | 3452 (83.1) | 2278 (84.7) | 1174 (80.1) |        | 1773 (85.9) | 1679 (81.3) |       |
| ≥37 U/mL                                              | 702 (16.9)  | 411 (15.3)  | 291 (19.9)  |        | 316 (14.1)  | 386 (18.7)  |       |

Abbreviations: BMI, body mass index; TNM, Tumor-node-metastasis.

**Table S3.** Association of OS-PII and DFS-PII with clinicopathological characteristics of colorectal cancer in the validation cohort.

| Demographic or Characteristic | Case (%)    | OS-PII      |             | p Value | DFS-PII     |             | p Value |
|-------------------------------|-------------|-------------|-------------|---------|-------------|-------------|---------|
|                               |             | ≤4.27       | >4.27       |         | ≤4.47       | >4.47       |         |
| Age (year)                    |             |             |             | <0.001  |             |             | 0.005   |
| <60                           | 2645 (51.2) | 1886 (53.8) | 759 (45.8)  |         | 1530 (53.0) | 1115 (49.0) |         |
| ≥60                           | 2516 (48.8) | 1618 (46.2) | 898 (54.2)  |         | 1356 (47.0) | 1160 (51.0) |         |
| Gender                        |             |             |             | <0.001  |             |             | 0.101   |
| Male                          | 3062 (59.3) | 1962 (56.0) | 1100 (66.4) |         | 1683 (58.3) | 1379 (60.6) |         |
| Female                        | 2099 (40.7) | 1542 (44.0) | 557 (33.6)  |         | 1203 (41.7) | 896 (39.4)  |         |
| Tumor location                |             |             |             | 0.012   |             |             | 0.429   |
| Colon                         | 2465 (47.8) | 1631 (46.5) | 834 (50.3)  |         | 1393 (48.3) | 1072 (47.1) |         |
| Rectum                        | 2696 (52.2) | 1873 (53.5) | 823 (49.7)  |         | 1493 (51.7) | 1203 (52.9) |         |
| Tumor diameter                |             |             |             | 0.001   |             |             | 0.320   |
| <50 mm                        | 3450 (66.8) | 2395 (68.4) | 1055 (63.7) |         | 1912 (66.3) | 1538 (67.6) |         |
| ≥50 mm                        | 1711 (33.2) | 1109 (31.6) | 602 (36.3)  |         | 974 (33.7)  | 737 (32.4)  |         |
| Pathological classification   |             |             |             | 0.140   |             |             | 0.377   |
| Prominence                    | 1277 (24.7) | 853 (24.3)  | 424 (25.7)  |         | 699 (24.2)  | 578 (25.4)  |         |

|                                                       |             |             |             |        |             |             |
|-------------------------------------------------------|-------------|-------------|-------------|--------|-------------|-------------|
| Infiltration or Ulceration                            | 3674 (71.2) | 2519 (71.9) | 1155 (69.6) |        | 2075 (71.9) | 1599 (70.3) |
| Infiltration and Ulceration                           | 210 (4.1)   | 132 (3.8)   | 78 (4.7)    |        | 112 (3.9)   | 98 (4.3)    |
| Differentiation degree                                |             |             |             | 0.003  |             | 0.094       |
| Well                                                  | 48 (0.9)    | 37 (1.1)    | 11 (0.7)    |        | 20 (0.7)    | 28 (1.2)    |
| Moderate                                              | 3755 (72.8) | 2593 (74.0) | 1162 (70.1) |        | 2129 (73.8) | 1626 (71.5) |
| Poor                                                  | 1358 (26.3) | 874 (24.9)  | 484 (29.2)  |        | 737 (25.5)  | 621 (27.3)  |
| Histologic classification                             |             |             |             | 0.138  |             | 0.121       |
| Adenocarcinoma                                        | 4342 (84.1) | 2965 (84.6) | 1377 (83.1) |        | 2448 (84.8) | 1894 (83.3) |
| Mucinous adenocarcinoma or signet ring cell carcinoma | 819 (15.9)  | 539 (15.4)  | 280 (16.9)  |        | 438 (15.2)  | 381 (16.7)  |
| TNM staging                                           |             |             |             | 0.513  |             | 0.086       |
| II                                                    | 2086 (40.4) | 1405 (40.1) | 681 (41.1)  |        | 1197 (41.5) | 889 (39.1)  |
| III                                                   | 3075 (59.6) | 2099 (59.9) | 976 (58.9)  |        | 1689 (58.5) | 1386 (60.9) |
| Tumor invasion                                        |             |             |             | 0.272  |             | 0.156       |
| T1-T3                                                 | 2588 (50.1) | 1776 (50.7) | 812 (49.0)  |        | 1473 (51.0) | 1115 (49.0) |
| T4                                                    | 2573 (49.9) | 1728 (49.3) | 845 (51.0)  |        | 1413 (49.0) | 1160 (51.0) |
| Cancer nodules                                        |             |             |             | 0.106  |             | 0.359       |
| No                                                    | 4249 (82.3) | 2906 (82.9) | 1343 (81.1) |        | 2389 (82.8) | 1860 (81.8) |
| Yes                                                   | 912 (17.7)  | 598 (17.1)  | 314 (18.9)  |        | 497 (17.2)  | 415 (18.2)  |
| Nerve invasion                                        |             |             |             | 0.735  |             | 0.035       |
| No                                                    | 3898 (75.5) | 2641 (75.4) | 1257 (75.9) |        | 2213 (76.7) | 1685 (74.1) |
| Yes                                                   | 1263 (24.5) | 863 (24.6)  | 400 (24.1)  |        | 673 (23.3)  | 590 (25.9)  |
| Vascular tumor thrombus                               |             |             |             | 0.736  |             | 0.031       |
| No                                                    | 3622 (70.2) | 2465 (70.3) | 1157 (69.8) |        | 2060 (71.4) | 1562 (68.7) |
| Yes                                                   | 1539 (29.8) | 1039 (29.7) | 500 (30.2)  |        | 826 (28.6)  | 713 (31.3)  |
| CEA                                                   |             |             |             | <0.001 |             | 0.088       |
| <5 ng/mL                                              | 2993 (58.0) | 2096 (59.8) | 897 (54.1)  |        | 1703 (59.0) | 1290 (56.7) |
| ≥5 ng/mL                                              | 2168 (42.0) | 1408 (40.2) | 760 (45.9)  |        | 1183 (41.0) | 985 (43.3)  |
| CA19-9                                                |             |             |             | 0.001  |             | 0.026       |
| <37 U/mL                                              | 4137 (80.2) | 2857 (81.5) | 1280 (77.2) |        | 2348 (81.4) | 1789 (78.6) |
| ≥37 U/mL                                              | 1024 (19.8) | 647 (18.5)  | 377 (22.8)  |        | 538 (18.6)  | 486 (21.4)  |

Abbreviations: BMI, body mass index; TNM, Tumor-node-metastasis.

**Table S4.** The overall survival rates at 1-, 3-, 5- and 10-year in groups stratified by OS-PII in the training cohort.

| Group                                 | 1-Year                |                | 3-Year                |                | 5-Year                |                | 10-Year               |                |
|---------------------------------------|-----------------------|----------------|-----------------------|----------------|-----------------------|----------------|-----------------------|----------------|
|                                       | OSR (SE) <sup>a</sup> | <i>p</i> Value | OSR (SE) <sup>a</sup> | <i>p</i> Value | OSR (SE) <sup>a</sup> | <i>p</i> Value | OSR (SE) <sup>a</sup> | <i>p</i> Value |
| All patients ( <i>N</i> = 4154)       | 0.946 (0.004)         |                | 0.808 (0.006)         |                | 0.723 (0.007)         |                | 0.631 (0.010)         |                |
| OS-PII                                |                       | <0.001         |                       | <0.001         |                       | <0.001         |                       | <0.001         |
| ≤4.27 ( <i>N</i> = 2689)              | 0.956 (0.004)         |                | 0.833 (0.007)         |                | 0.747 (0.009)         |                | 0.672 (0.012)         |                |
| >4.27 ( <i>N</i> = 1465)              | 0.927 (0.007)         |                | 0.761 (0.011)         |                | 0.681 (0.012)         |                | 0.560 (0.018)         |                |
| Stage II patients ( <i>N</i> = 2385)  | 0.975 (0.003)         |                | 0.898 (0.006)         |                | 0.818 (0.008)         |                | 0.712 (0.012)         |                |
| OS-PII                                |                       | 0.039          |                       | <0.001         |                       | 0.002          |                       | <0.001         |
| ≤4.27 ( <i>N</i> = 1515)              | 0.980 (0.004)         |                | 0.920 (0.007)         |                | 0.837 (0.010)         |                | 0.752 (0.014)         |                |
| >4.27 ( <i>N</i> = 870)               | 0.966 (0.006)         |                | 0.858 (0.012)         |                | 0.785 (0.014)         |                | 0.644 (0.021)         |                |
| Stage III patients ( <i>N</i> = 1769) | 0.906 (0.007)         |                | 0.684 (0.011)         |                | 0.590 (0.012)         |                | 0.522 (0.024)         |                |
| OS-PII                                |                       | <0.001         |                       | <0.001         |                       | <0.001         |                       | <0.001         |
| ≤4.27 ( <i>N</i> = 1174)              | 0.925 (0.008)         |                | 0.719 (0.013)         |                | 0.625 (0.015)         |                | 0.576 (0.020)         |                |
| >4.27 ( <i>N</i> = 595)               | 0.870 (0.014)         |                | 0.615 (0.020)         |                | 0.520 (0.021)         |                | 0.425 (0.046)         |                |

<sup>a</sup> Overall survival rate (standard error)

**Table S5.** The disease-free survival rates at 1-, 3-, 5- and 10-year in groups stratified by DFS-PII in the training cohort.

| Group                           | 1-Year                 |                | 3-Year                 |                | 5-Year                 |                | 10-Year                |                |
|---------------------------------|------------------------|----------------|------------------------|----------------|------------------------|----------------|------------------------|----------------|
|                                 | DFSR (SE) <sup>a</sup> | <i>p</i> Value | DFSR (SE) <sup>a</sup> | <i>p</i> Value | DFSR (SE) <sup>a</sup> | <i>p</i> Value | DFSR (SE) <sup>a</sup> | <i>p</i> Value |
| All patients ( <i>N</i> = 4154) | 0.920 (0.004)          |                | 0.810 (0.006)          |                | 0.759 (0.007)          |                | 0.715 (0.008)          |                |
| DFS-PII                         |                        | <0.001         |                        | 0.001          |                        | <0.001         |                        | <0.001         |

|                               |               |               |               |               |
|-------------------------------|---------------|---------------|---------------|---------------|
| ≤4.47 (N = 2089)              | 0.937 (0.005) | 0.831 (0.008) | 0.791 (0.009) | 0.756 (0.012) |
| >4.47 (N = 2065)              | 0.903 (0.007) | 0.787 (0.009) | 0.726 (0.010) | 0.672 (0.013) |
| Stage II patients (N = 2385)  | 0.958 (0.004) | 0.885 (0.007) | 0.842 (0.008) | 0.809 (0.009) |
| DFS-II                        | <0.001        | 0.002         | <0.001        | <0.001        |
| ≤4.47 (N =1199)               | 0.975 (0.005) | 0.906 (0.009) | 0.871 (0.010) | 0.843 (0.012) |
| >4.47 (N =1186)               | 0.941 (0.007) | 0.864 (0.010) | 0.813 (0.012) | 0.775 (0.013) |
| Stage III patients (N = 1769) | 0.869 (0.008) | 0.702 (0.011) | 0.637 (0.012) | 0.526 (0.027) |
| DFS-II                        | 0.051         | 0.079         | 0.010         | 0.003         |
| ≤4.47 (N =890)                | 0.886 (0.011) | 0.727 (0.015) | 0.677 (0.017) | 0.604 (0.033) |
| >4.47 (N =879)                | 0.851 (0.012) | 0.676 (0.017) | 0.594 (0.018) | 0.443 (0.043) |

<sup>a</sup> Disease-free survival rate (standard error)

**Table S6.** The overall survival rates at 1-, 3-, 5-year in groups stratified by OS-PII in the validation cohort.

| Group                         | 1-Year                |         | 3-Year                |         | 5-Year                |         |
|-------------------------------|-----------------------|---------|-----------------------|---------|-----------------------|---------|
|                               | OSR (SE) <sup>a</sup> | p Value | OSR (SE) <sup>a</sup> | p Value | OSR (SE) <sup>a</sup> | p Value |
| All patients (N = 5161)       | 0.960 (0.003)         |         | 0.865 (0.006)         |         | 0.798 (0.010)         |         |
| OS-PII                        |                       | <0.001  |                       | <0.001  |                       | <0.001  |
| ≤4.27 (N = 3504)              | 0.969 (0.003)         |         | 0.881 (0.007)         |         | 0.820 (0.011)         |         |
| >4.27 (N = 1657)              | 0.940 (0.006)         |         | 0.831 (0.012)         |         | 0.750 (0.019)         |         |
| Stage II patients (N = 2086)  | 0.987 (0.003)         |         | 0.939 (0.007)         |         | 0.884 (0.013)         |         |
| OS-PII                        |                       | 0.002   |                       | <0.001  |                       | <0.001  |
| ≤4.27 (N =1405)               | 0.993 (0.002)         |         | 0.956 (0.008)         |         | 0.918 (0.013)         |         |
| >4.27 (N =681)                | 0.974 (0.007)         |         | 0.907 (0.015)         |         | 0.813 (0.028)         |         |
| Stage III patients (N = 3075) | 0.941 (0.005)         |         | 0.815 (0.009)         |         | 0.740 (0.013)         |         |
| OS-PII                        |                       | <0.001  |                       | <0.001  |                       | 0.001   |
| ≤4.27 (N =2099)               | 0.953 (0.005)         |         | 0.832 (0.011)         |         | 0.756 (0.017)         |         |
| >4.27 (N =976)                | 0.916 (0.009)         |         | 0.778 (0.017)         |         | 0.706 (0.024)         |         |

<sup>a</sup> Overall survival rate (standard error)

**Table S7.** The disease-free survival rates at 1-, 3-, 5-year in groups stratified by DFS-PII in the validation cohort.

| Group                         | 1-Year                 |         | 3-Year                 |         | 5-Year                 |         |
|-------------------------------|------------------------|---------|------------------------|---------|------------------------|---------|
|                               | DFSR (SE) <sup>a</sup> | p Value | DFSR (SE) <sup>a</sup> | p Value | DFSR (SE) <sup>a</sup> | p Value |
| All patients (N = 5161)       | 0.901 (0.004)          |         | 0.749 (0.008)          |         | 0.689 (0.010)          |         |
| DFS-PII                       |                        | 0.003   |                        | 0.002   |                        | <0.001  |
| ≤4.47 (N = 2886)              | 0.912 (0.006)          |         | 0.766 (0.010)          |         | 0.715 (0.013)          |         |
| >4.47 (N = 2275)              | 0.887 (0.007)          |         | 0.728 (0.012)          |         | 0.655 (0.016)          |         |
| Stage II patients (N = 2086)  | 0.951 (0.005)          |         | 0.855 (0.010)          |         | 0.802 (0.014)          |         |
| DFS-PII                       |                        | 0.004   |                        | 0.005   |                        | 0.002   |
| ≤4.47 (N =1197)               | 0.964 (0.006)          |         | 0.873 (0.013)          |         | 0.830 (0.017)          |         |
| >4.47 (N =889)                | 0.935 (0.009)          |         | 0.830 (0.016)          |         | 0.762 (0.023)          |         |
| Stage III patients (N = 3075) | 0.867 (0.007)          |         | 0.679 (0.011)          |         | 0.614 (0.013)          |         |
| DFS-PII                       |                        | 0.105   |                        | 0.093   |                        | 0.048   |
| ≤4.47 (N =1689)               | 0.875 (0.009)          |         | 0.692 (0.014)          |         | 0.635 (0.018)          |         |
| >4.47 (N =1386)               | 0.856 (0.010)          |         | 0.663 (0.016)          |         | 0.589 (0.020)          |         |

<sup>a</sup> Disease-free survival rate (standard error)

**Table S8.** Time-dependent ROC analyses for predicting overall survival of patients with colorectal cancer in the training cohort.

| AUROC  | NLR   | PLR   | LMR   | SII   | OS-PII | TNM   | TNM + OS-PII | p Value <sup>a</sup> | p Value <sup>b</sup> | p Value <sup>c</sup> | p Value <sup>d</sup> | p Value <sup>e</sup> |
|--------|-------|-------|-------|-------|--------|-------|--------------|----------------------|----------------------|----------------------|----------------------|----------------------|
| 1-year | 0.581 | 0.578 | 0.587 | 0.596 | 0.586  | 0.671 | 0.713        | 0.832                | 0.705                | 0.787                | 0.957                | <0.001               |
| 2-year | 0.549 | 0.532 | 0.553 | 0.552 | 0.564  | 0.675 | 0.707        | 0.261                | 0.433                | 0.082                | 0.340                | <0.001               |
| 3-year | 0.542 | 0.519 | 0.543 | 0.538 | 0.562  | 0.676 | 0.709        | 0.085                | 0.072                | 0.006                | 0.066                | <0.001               |
| 4-year | 0.531 | 0.511 | 0.537 | 0.524 | 0.550  | 0.667 | 0.693        | 0.072                | 0.032                | 0.006                | 0.167                | <0.001               |
| 5-year | 0.524 | 0.502 | 0.529 | 0.515 | 0.545  | 0.665 | 0.687        | 0.040                | 0.012                | 0.002                | 0.091                | <0.001               |
| 6-year | 0.525 | 0.479 | 0.535 | 0.502 | 0.557  | 0.672 | 0.700        | 0.003                | <0.001               | <0.001               | 0.021                | <0.001               |
| 7-year | 0.525 | 0.469 | 0.536 | 0.498 | 0.566  | 0.694 | 0.727        | <0.001               | <0.001               | <0.001               | 0.003                | <0.001               |

|         |       |       |       |       |       |       |       |       |        |        |       |        |
|---------|-------|-------|-------|-------|-------|-------|-------|-------|--------|--------|-------|--------|
| 8-year  | 0.514 | 0.463 | 0.520 | 0.489 | 0.547 | 0.706 | 0.732 | 0.009 | <0.001 | <0.001 | 0.021 | <0.001 |
| 9-year  | 0.494 | 0.455 | 0.511 | 0.473 | 0.534 | 0.715 | 0.737 | 0.006 | <0.001 | <0.001 | 0.098 | 0.011  |
| 10-year | 0.462 | 0.430 | 0.510 | 0.446 | 0.485 | 0.710 | 0.708 | 0.229 | 0.083  | 0.034  | 0.193 | 0.895  |
| 11-year | 0.460 | 0.372 | 0.509 | 0.403 | 0.527 | 0.729 | 0.751 | 0.026 | <0.001 | <0.001 | 0.405 | 0.157  |

Abbreviations: AUROC, area under the receiver operating characteristic curve; TNM, Tumor-node-metastasis. The AUROC represented the prognostic prediction ability of Cox models involving single parameter, like NLR (continuous variable), PLR (continuous variable), LMR (continuous variable), SII (continuous variable), OS-P-II (continuous variable), TNM (stage II and III), and combination of OS-P-II and TNM. <sup>a</sup> Comparison of the AUROCs of OS-P-II and NLR. <sup>b</sup> Comparison of the AUROCs of OS-P-II and SII. <sup>c</sup> Comparison of the AUROCs of OS-P-II and PLR. <sup>d</sup> Comparison of the AUROCs of OS-P-II and LMR. <sup>e</sup> Comparison of the AUROCs of TNM and a combination of TNM and OS-P-II.

**Table S9.** Time-dependent ROC analyses for predicting disease-free survival of patients with colorectal cancer in the training cohort.

| AUROC   | NLR   | PLR   | LMR   | SII   | DFS-P-II | TNM   | TNM + DFS-P-II | <i>p</i> Value <sup>a</sup> | <i>p</i> Value <sup>b</sup> | <i>p</i> Value <sup>c</sup> | <i>p</i> Value <sup>d</sup> | <i>p</i> Value <sup>e</sup> |
|---------|-------|-------|-------|-------|----------|-------|----------------|-----------------------------|-----------------------------|-----------------------------|-----------------------------|-----------------------------|
| 1-year  | 0.531 | 0.514 | 0.537 | 0.529 | 0.569    | 0.654 | 0.688          | 0.077                       | 0.101                       | 0.046                       | 0.196                       | <0.001                      |
| 2-year  | 0.520 | 0.503 | 0.522 | 0.517 | 0.549    | 0.656 | 0.680          | 0.064                       | 0.077                       | 0.021                       | 0.124                       | <0.001                      |
| 3-year  | 0.521 | 0.495 | 0.521 | 0.515 | 0.548    | 0.658 | 0.682          | 0.066                       | 0.038                       | 0.003                       | 0.082                       | <0.001                      |
| 4-year  | 0.519 | 0.490 | 0.521 | 0.508 | 0.550    | 0.661 | 0.686          | 0.025                       | 0.005                       | <0.001                      | 0.043                       | <0.001                      |
| 5-year  | 0.522 | 0.486 | 0.525 | 0.506 | 0.558    | 0.668 | 0.697          | 0.006                       | <0.001                      | <0.001                      | 0.016                       | <0.001                      |
| 6-year  | 0.519 | 0.462 | 0.525 | 0.491 | 0.569    | 0.680 | 0.714          | <0.001                      | <0.001                      | <0.001                      | 0.002                       | <0.001                      |
| 7-year  | 0.522 | 0.456 | 0.526 | 0.490 | 0.578    | 0.711 | 0.749          | <0.001                      | <0.001                      | <0.001                      | 0.001                       | <0.001                      |
| 8-year  | 0.506 | 0.445 | 0.508 | 0.480 | 0.571    | 0.730 | 0.765          | <0.001                      | <0.001                      | <0.001                      | <0.001                      | <0.001                      |
| 9-year  | 0.489 | 0.434 | 0.495 | 0.464 | 0.562    | 0.751 | 0.781          | <0.001                      | <0.001                      | <0.001                      | <0.001                      | <0.001                      |
| 10-year | 0.447 | 0.399 | 0.482 | 0.425 | 0.520    | 0.753 | 0.764          | 0.001                       | <0.001                      | <0.001                      | 0.137                       | 0.241                       |
| 11-year | 0.449 | 0.346 | 0.482 | 0.385 | 0.550    | 0.776 | 0.800          | 0.001                       | <0.001                      | <0.001                      | 0.636                       | 0.060                       |

Abbreviations: AUROC, area under the receiver operating characteristic curve; TNM, Tumor-node-metastasis. The AUROC represented the prognostic prediction ability of Cox models involving single parameter, like NLR (continuous variable), PLR (continuous variable), LMR (continuous variable), SII (continuous variable), OS-P-II (continuous variable), TNM (stage II and III), and combination of OS-P-II and TNM. <sup>a</sup> Comparison of the AUROCs of DFS-P-II and NLR. <sup>b</sup> Comparison of the AUROCs of DFS-P-II and SII. <sup>c</sup> Comparison of the AUROCs of DFS-P-II and PLR. <sup>d</sup> Comparison of the AUROCs of DFS-P-II and LMR. <sup>e</sup> Comparison of the AUROCs of TNM and a combination of TNM and DFS-P-II.

**Table S10.** Time-dependent ROC analyses for predicting overall survival of patients with colorectal cancer in the validation cohort.

| AUROC  | NLR   | PLR   | LMR   | SII   | OS-P-II | TNM   | TNM + OS-P-II | <i>p</i> Value <sup>a</sup> | <i>p</i> Value <sup>b</sup> | <i>p</i> Value <sup>c</sup> | <i>p</i> Value <sup>d</sup> | <i>p</i> Value <sup>e</sup> |
|--------|-------|-------|-------|-------|---------|-------|---------------|-----------------------------|-----------------------------|-----------------------------|-----------------------------|-----------------------------|
| 1-year | 0.661 | 0.589 | 0.658 | 0.653 | 0.625   | 0.638 | 0.707         | 0.106                       | 0.263                       | 0.193                       | 0.082                       | <0.001                      |
| 2-year | 0.623 | 0.554 | 0.603 | 0.602 | 0.599   | 0.645 | 0.702         | 0.155                       | 0.861                       | 0.050                       | 0.794                       | <0.001                      |
| 3-year | 0.592 | 0.550 | 0.560 | 0.576 | 0.566   | 0.624 | 0.660         | 0.104                       | 0.618                       | 0.469                       | 0.692                       | <0.001                      |
| 4-year | 0.592 | 0.520 | 0.539 | 0.551 | 0.575   | 0.613 | 0.654         | 0.283                       | 0.257                       | 0.019                       | 0.014                       | <0.001                      |
| 5-year | 0.600 | 0.528 | 0.528 | 0.555 | 0.561   | 0.610 | 0.642         | 0.053                       | 0.777                       | 0.198                       | 0.060                       | 0.003                       |
| 6-year | 0.612 | 0.532 | 0.549 | 0.558 | 0.587   | 0.607 | 0.659         | 0.297                       | 0.296                       | 0.086                       | 0.073                       | <0.001                      |
| 7-year | 0.669 | 0.608 | 0.638 | 0.633 | 0.628   | 0.579 | 0.662         | 0.305                       | 0.916                       | 0.696                       | 0.794                       | <0.001                      |

Abbreviations: AUROC, area under the receiver operating characteristic curve; TNM, Tumor-node-metastasis. The AUROC represented the prognostic prediction ability of Cox models involving single parameter, like NLR (continuous variable), PLR (continuous variable), LMR (continuous variable), SII (continuous variable), OS-P-II (continuous variable), TNM (stage II and III), and combination of OS-P-II and TNM. <sup>a</sup> Comparison of the AUROCs of OS-P-II and NLR. <sup>b</sup> Comparison of the AUROCs of OS-P-II and SII. <sup>c</sup> Comparison of the AUROCs of OS-P-II and PLR. <sup>d</sup> Comparison of the AUROCs of OS-P-II and LMR. <sup>e</sup> Comparison of the AUROCs of TNM and a combination of TNM and OS-P-II.

**Table S11.** Time-dependent ROC analyses for predicting disease-free survival of patients with colorectal cancer in the validation cohort.

| AUROC  | NLR   | PLR   | LMR   | SII   | DFS-P-II | TNM   | TNM + DFS-P-II | <i>p</i> Value <sup>a</sup> | <i>p</i> Value <sup>b</sup> | <i>p</i> Value <sup>c</sup> | <i>p</i> Value <sup>d</sup> | <i>p</i> Value <sup>e</sup> |
|--------|-------|-------|-------|-------|----------|-------|----------------|-----------------------------|-----------------------------|-----------------------------|-----------------------------|-----------------------------|
| 1-year | 0.587 | 0.552 | 0.587 | 0.577 | 0.550    | 0.613 | 0.637          | 0.043                       | 0.194                       | 0.920                       | 0.528                       | 0.002                       |
| 2-year | 0.558 | 0.521 | 0.544 | 0.540 | 0.549    | 0.622 | 0.647          | 0.531                       | 0.601                       | 0.128                       | 0.737                       | <0.001                      |
| 3-year | 0.559 | 0.520 | 0.514 | 0.536 | 0.535    | 0.607 | 0.622          | 0.106                       | 0.953                       | 0.445                       | 0.190                       | 0.028                       |

|        |       |       |       |       |       |       |       |       |       |       |       |       |
|--------|-------|-------|-------|-------|-------|-------|-------|-------|-------|-------|-------|-------|
| 4-year | 0.573 | 0.510 | 0.500 | 0.534 | 0.540 | 0.603 | 0.620 | 0.051 | 0.727 | 0.154 | 0.024 | 0.024 |
| 5-year | 0.586 | 0.509 | 0.491 | 0.537 | 0.541 | 0.606 | 0.619 | 0.024 | 0.862 | 0.211 | 0.022 | 0.173 |
| 6-year | 0.591 | 0.519 | 0.520 | 0.541 | 0.556 | 0.599 | 0.618 | 0.210 | 0.629 | 0.296 | 0.229 | 0.142 |
| 7-year | 0.648 | 0.607 | 0.618 | 0.620 | 0.519 | 0.570 | 0.588 | 0.005 | 0.054 | 0.132 | 0.058 | 0.899 |

Abbreviations: AUROC, area under the receiver operating characteristic curve; TNM, Tumor-node-metastasis. The AUROC represented the prognostic prediction ability of Cox models involving single parameter, like NLR (continuous variable), PLR (continuous variable), LMR (continuous variable), SII (continuous variable), OS-PII (continuous variable), TNM (stage II and III), and combination of OS-PII and TNM. <sup>a</sup> Comparison of the AUROCs of DFS-PII and NLR. <sup>b</sup> Comparison of the AUROCs of DFS-PII and SII. <sup>c</sup> Comparison of the AUROCs of DFS-PII and PLR. <sup>d</sup> Comparison of the AUROCs of DFS-PII and LMR. <sup>e</sup> Comparison of the prognostic accuracy of TNM and a combination of TNM and DFS-PII.

**Table S12.** The C-index of AJCC system and nomograms.

| Models                | Training Cohort (N = 4154) |             | Validation Cohort (N = 5161) |             |
|-----------------------|----------------------------|-------------|------------------------------|-------------|
|                       | C-index                    | 95% CI      | C-index                      | 95% CI      |
| Overall Survival      |                            |             |                              |             |
| AJCC system           | 0.654                      | 0.639–0.669 | 0.700                        | 0.678–0.722 |
| Nomogram              | 0.718                      | 0.704–0.731 | 0.765                        | 0.745–0.785 |
| Disease-free Survival |                            |             |                              |             |
| AJCC system           | 0.654                      | 0.638–0.671 | 0.657                        | 0.640–0.674 |
| Nomogram              | 0.700                      | 0.684–0.716 | 0.698                        | 0.681–0.715 |

Abbreviations: AJCC, American Joint Committee on Cancer.

**Table S13.** Time-dependent ROC analyses stratified by TNM staging for predicting survival of patients with colorectal cancer in the training cohort.

| Marker                | 1-Year | 2-Year | 3-Year | 4-Year | 5-Year | 6-Year | 7-Year | 8-Year | 9-Year | 10-Year | 11-Year |
|-----------------------|--------|--------|--------|--------|--------|--------|--------|--------|--------|---------|---------|
| Overall Survival      |        |        |        |        |        |        |        |        |        |         |         |
| NLR (overall)         | 0.581  | 0.549  | 0.542  | 0.531  | 0.524  | 0.525  | 0.525  | 0.514  | 0.494  | 0.462   | 0.460   |
| NLR (stage II)        | 0.604  | 0.564  | 0.555  | 0.540  | 0.521  | 0.525  | 0.530  | 0.524  | 0.501  | 0.466   | 0.467   |
| NLR (stage III)       | 0.588  | 0.561  | 0.558  | 0.548  | 0.549  | 0.549  | 0.552  | 0.524  | 0.531  | 0.523   | 0.502   |
| PLR (overall)         | 0.578  | 0.532  | 0.519  | 0.511  | 0.502  | 0.479  | 0.469  | 0.463  | 0.455  | 0.430   | 0.372   |
| PLR (stage II)        | 0.511  | 0.539  | 0.518  | 0.514  | 0.497  | 0.481  | 0.473  | 0.467  | 0.462  | 0.434   | 0.383   |
| PLR (stage III)       | 0.615  | 0.543  | 0.533  | 0.520  | 0.515  | 0.478  | 0.464  | 0.466  | 0.453  | 0.449   | 0.261   |
| LMR (overall)         | 0.587  | 0.553  | 0.543  | 0.537  | 0.529  | 0.535  | 0.536  | 0.520  | 0.511  | 0.510   | 0.552   |
| LMR (stage II)        | 0.571  | 0.556  | 0.557  | 0.545  | 0.532  | 0.540  | 0.548  | 0.536  | 0.521  | 0.518   | 0.569   |
| LMR (stage III)       | 0.607  | 0.567  | 0.553  | 0.551  | 0.542  | 0.548  | 0.528  | 0.487  | 0.535  | 0.565   | 0.489   |
| SII (overall)         | 0.596  | 0.552  | 0.538  | 0.524  | 0.515  | 0.502  | 0.498  | 0.489  | 0.473  | 0.446   | 0.403   |
| SII (stage II)        | 0.576  | 0.554  | 0.540  | 0.527  | 0.508  | 0.499  | 0.500  | 0.493  | 0.477  | 0.452   | 0.415   |
| SII (stage III)       | 0.619  | 0.570  | 0.557  | 0.541  | 0.539  | 0.521  | 0.513  | 0.501  | 0.485  | 0.443   | 0.281   |
| OS-PII (overall)      | 0.586  | 0.564  | 0.562  | 0.550  | 0.545  | 0.557  | 0.566  | 0.547  | 0.534  | 0.485   | 0.527   |
| OS-PII (stage II)     | 0.587  | 0.561  | 0.588  | 0.555  | 0.544  | 0.558  | 0.575  | 0.561  | 0.551  | 0.503   | 0.549   |
| OS-PII (stage III)    | 0.596  | 0.579  | 0.565  | 0.565  | 0.562  | 0.574  | 0.566  | 0.520  | 0.493  | 0.433   | 0.354   |
| Disease-free Survival |        |        |        |        |        |        |        |        |        |         |         |
| NLR (overall)         | 0.531  | 0.520  | 0.522  | 0.520  | 0.522  | 0.519  | 0.522  | 0.506  | 0.489  | 0.447   | 0.449   |
| NLR (stage II)        | 0.513  | 0.523  | 0.528  | 0.529  | 0.530  | 0.525  | 0.533  | 0.519  | 0.497  | 0.457   | 0.458   |
| NLR (stage III)       | 0.559  | 0.539  | 0.542  | 0.539  | 0.546  | 0.547  | 0.553  | 0.527  | 0.566  | 0.521   | 0.624   |
| PLR (overall)         | 0.514  | 0.503  | 0.495  | 0.490  | 0.486  | 0.462  | 0.456  | 0.445  | 0.434  | 0.399   | 0.346   |
| PLR (stage II)        | 0.481  | 0.517  | 0.511  | 0.517  | 0.509  | 0.485  | 0.479  | 0.464  | 0.451  | 0.415   | 0.367   |
| PLR (stage III)       | 0.544  | 0.511  | 0.500  | 0.483  | 0.482  | 0.451  | 0.447  | 0.451  | 0.445  | 0.423   | 0.287   |
| LMR (overall)         | 0.538  | 0.523  | 0.522  | 0.521  | 0.525  | 0.525  | 0.527  | 0.508  | 0.496  | 0.483   | 0.531   |
| LMR (stage II)        | 0.530  | 0.531  | 0.538  | 0.542  | 0.547  | 0.545  | 0.551  | 0.535  | 0.511  | 0.499   | 0.551   |
| LMR (stage III)       | 0.558  | 0.536  | 0.529  | 0.527  | 0.528  | 0.531  | 0.513  | 0.476  | 0.554  | 0.550   | 0.562   |
| SII (overall)         | 0.530  | 0.518  | 0.515  | 0.508  | 0.506  | 0.491  | 0.490  | 0.480  | 0.464  | 0.425   | 0.385   |
| SII (stage II)        | 0.510  | 0.520  | 0.526  | 0.527  | 0.519  | 0.501  | 0.505  | 0.496  | 0.478  | 0.443   | 0.406   |
| SII (stage III)       | 0.557  | 0.538  | 0.530  | 0.517  | 0.521  | 0.507  | 0.504  | 0.495  | 0.502  | 0.429   | 0.318   |
| DFS-PII (overall)     | 0.569  | 0.549  | 0.548  | 0.550  | 0.558  | 0.569  | 0.578  | 0.571  | 0.562  | 0.520   | 0.550   |
| DFS-PII (stage II)    | 0.631  | 0.586  | 0.572  | 0.570  | 0.578  | 0.584  | 0.595  | 0.587  | 0.575  | 0.530   | 0.560   |
| DFS-PII (stage III)   | 0.543  | 0.531  | 0.538  | 0.541  | 0.550  | 0.563  | 0.568  | 0.549  | 0.561  | 0.529   | 0.595   |

Abbreviations: TNM, Tumor-node-metastasis.

**Table S14.** Time-dependent ROC analyses stratified by TNM staging for predicting survival of patients with colorectal cancer in the validation cohort.

| Marker                | 1-Year | 2-Year | 3-Year | 4-Year | 5-Year | 6-Year | 7-Year |
|-----------------------|--------|--------|--------|--------|--------|--------|--------|
| Overall Survival      |        |        |        |        |        |        |        |
| NLR (overall)         | 0.661  | 0.623  | 0.592  | 0.592  | 0.600  | 0.612  | 0.669  |
| NLR (stage II)        | 0.688  | 0.592  | 0.569  | 0.561  | 0.587  | 0.570  | 0.688  |
| NLR (stage III)       | 0.663  | 0.635  | 0.603  | 0.606  | 0.607  | 0.631  | 0.668  |
| PLR (overall)         | 0.589  | 0.554  | 0.550  | 0.520  | 0.528  | 0.532  | 0.608  |
| PLR (stage II)        | 0.617  | 0.492  | 0.506  | 0.453  | 0.492  | 0.507  | 0.637  |
| PLR (stage III)       | 0.591  | 0.571  | 0.563  | 0.541  | 0.543  | 0.543  | 0.596  |
| LMR (overall)         | 0.658  | 0.603  | 0.560  | 0.539  | 0.528  | 0.549  | 0.638  |
| LMR (stage II)        | 0.709  | 0.571  | 0.553  | 0.522  | 0.528  | 0.516  | 0.616  |
| LMR (stage III)       | 0.657  | 0.618  | 0.569  | 0.552  | 0.537  | 0.575  | 0.660  |
| SII (overall)         | 0.653  | 0.602  | 0.576  | 0.551  | 0.555  | 0.558  | 0.633  |
| SII (stage II)        | 0.639  | 0.537  | 0.522  | 0.458  | 0.501  | 0.476  | 0.615  |
| SII (stage III)       | 0.664  | 0.623  | 0.594  | 0.583  | 0.572  | 0.594  | 0.644  |
| OS-PII (overall)      | 0.625  | 0.599  | 0.566  | 0.575  | 0.561  | 0.587  | 0.628  |
| OS-PII (stage II)     | 0.712  | 0.638  | 0.601  | 0.618  | 0.609  | 0.623  | 0.622  |
| OS-PII (stage III)    | 0.614  | 0.601  | 0.562  | 0.572  | 0.554  | 0.594  | 0.659  |
| Disease-free Survival |        |        |        |        |        |        |        |
| NLR (overall)         | 0.587  | 0.558  | 0.559  | 0.573  | 0.586  | 0.591  | 0.648  |
| NLR (stage II)        | 0.554  | 0.535  | 0.546  | 0.542  | 0.559  | 0.544  | 0.632  |
| NLR (stage III)       | 0.602  | 0.571  | 0.569  | 0.591  | 0.602  | 0.617  | 0.660  |
| PLR (overall)         | 0.552  | 0.521  | 0.520  | 0.510  | 0.509  | 0.519  | 0.607  |
| PLR (stage II)        | 0.525  | 0.495  | 0.493  | 0.464  | 0.471  | 0.507  | 0.627  |
| PLR (stage III)       | 0.566  | 0.534  | 0.532  | 0.529  | 0.528  | 0.526  | 0.595  |
| LMR (overall)         | 0.587  | 0.544  | 0.514  | 0.500  | 0.491  | 0.520  | 0.618  |
| LMR (stage II)        | 0.557  | 0.508  | 0.494  | 0.475  | 0.468  | 0.482  | 0.580  |
| LMR (stage III)       | 0.601  | 0.563  | 0.529  | 0.518  | 0.512  | 0.555  | 0.649  |
| SII (overall)         | 0.577  | 0.540  | 0.536  | 0.534  | 0.537  | 0.541  | 0.620  |
| SII (stage II)        | 0.520  | 0.490  | 0.497  | 0.474  | 0.488  | 0.479  | 0.579  |
| SII (stage III)       | 0.599  | 0.561  | 0.554  | 0.561  | 0.557  | 0.574  | 0.643  |
| DFS-PII (overall)     | 0.550  | 0.549  | 0.535  | 0.540  | 0.541  | 0.556  | 0.519  |
| DFS-PII (stage II)    | 0.604  | 0.599  | 0.572  | 0.587  | 0.601  | 0.613  | 0.618  |
| DFS-PII (stage III)   | 0.534  | 0.536  | 0.519  | 0.519  | 0.503  | 0.514  | 0.462  |

Abbreviations: TNM, Tumor-node-metastasis.

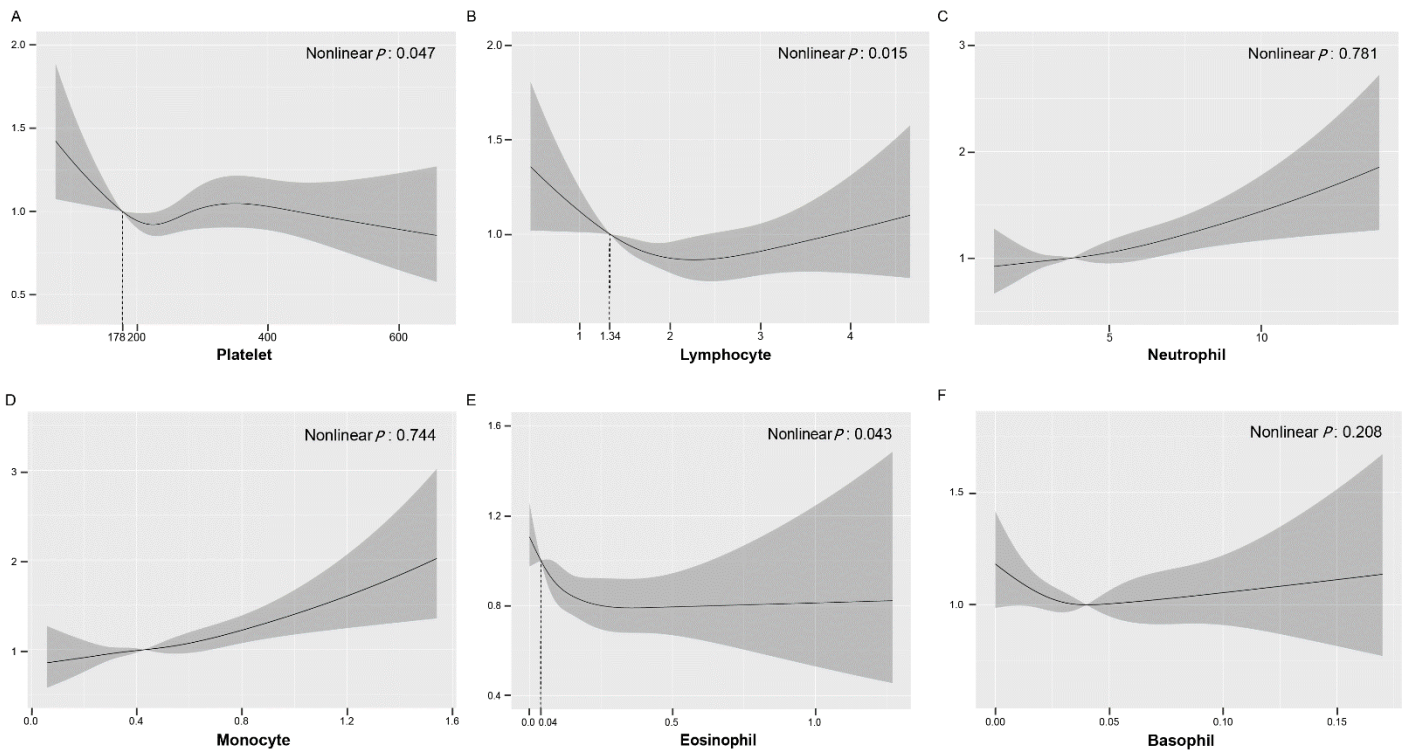

**Figure S1.** Restricted cubic spline regression for assessing the nonlinear relationship between preoperative peripheral blood cell counts and overall survival of patients with colorectal cancer.

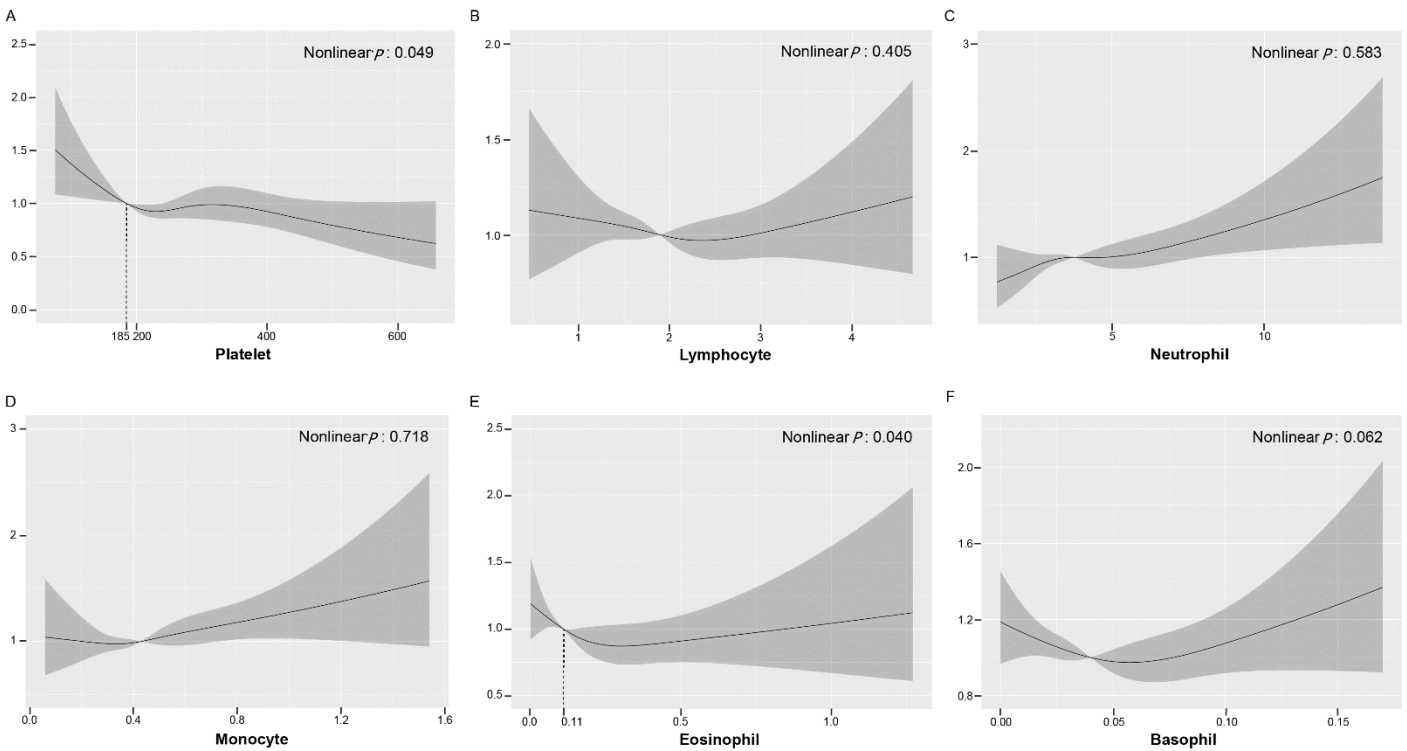

**Figure S2.** Restricted cubic spline regression for assessing the nonlinear relationship between preoperative peripheral blood cell counts and disease-free survival of patients with colorectal cancer.



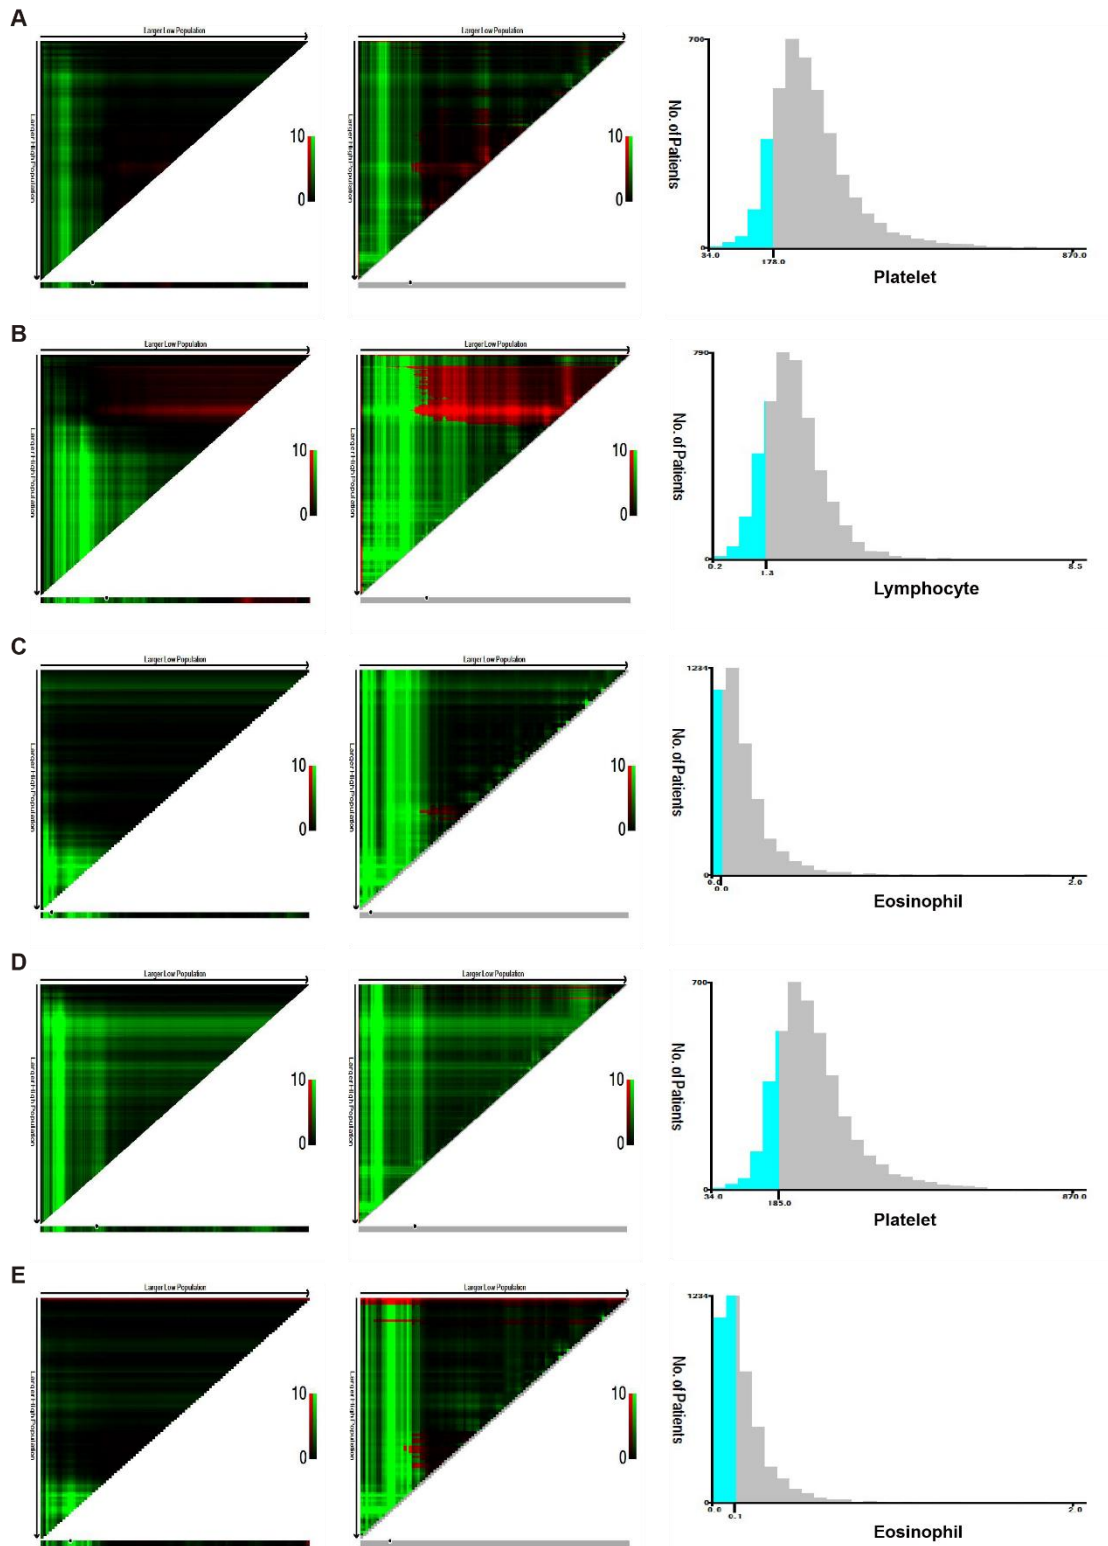

**Figure S3.** Determination of the cut-off value for platelet, lymphocyte, and eosinophil counts. X-tile analyses of overall survival (A–C) and disease-free survival (D–E) were performed using patients’ data to determine the cut-off value for platelet, lymphocyte and eosinophil counts.

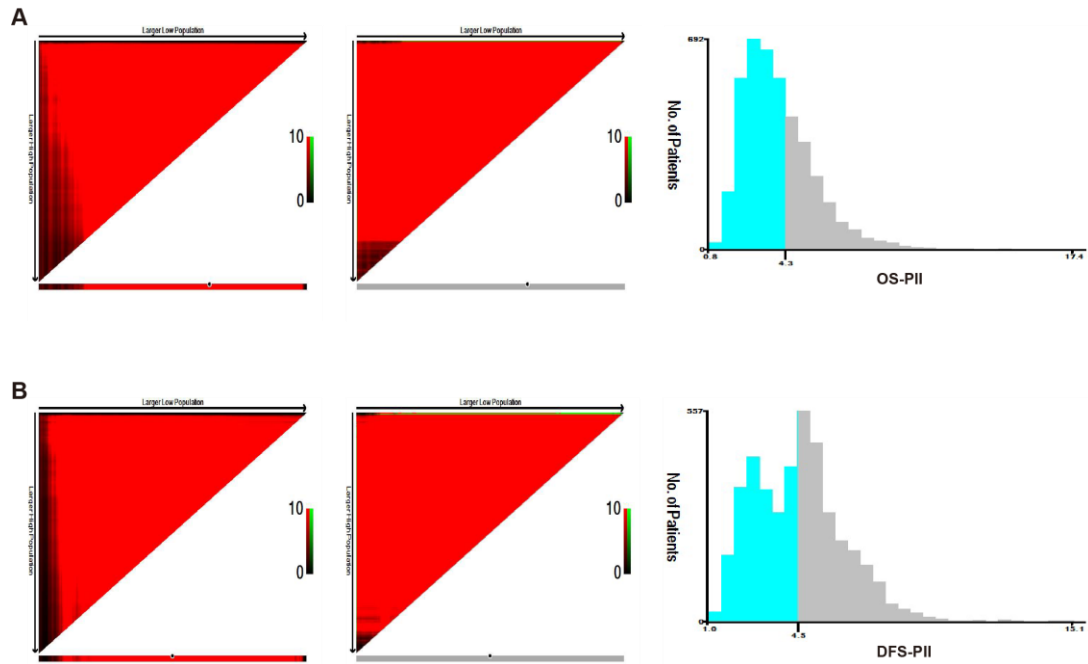

**Figure S4.** Determination of the optimal cut-off value for the OS-P11 and DFS-P11. X-tile analyses were performed using patients' data to determine the optimal cut-off value for the OS-P11 (A) and DFS-P11 (B).

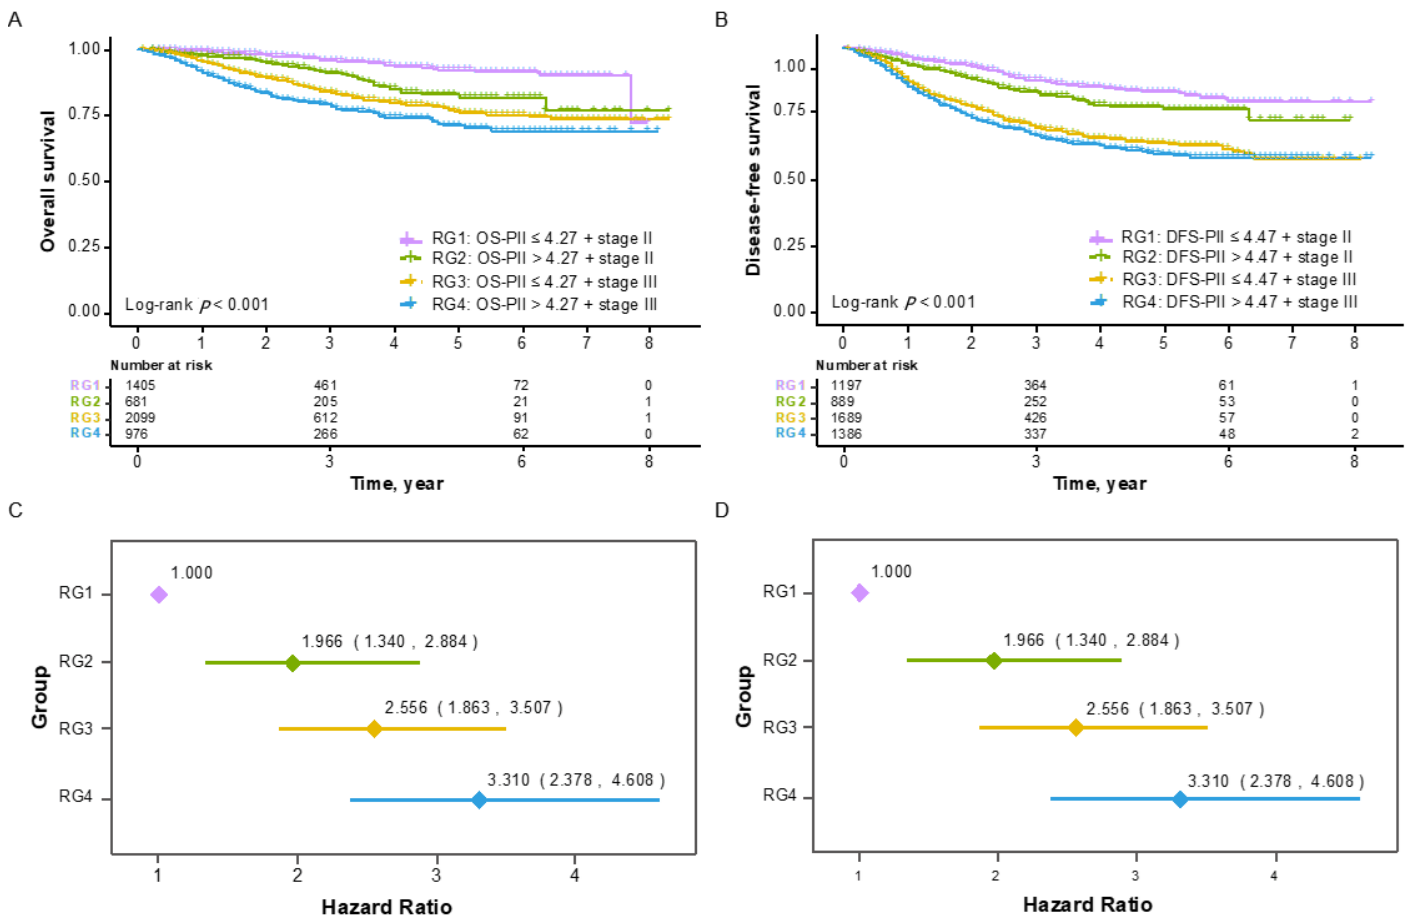

**Figure S5.** Risk stratification combining P11s and TNM staging in relation to overall survival and disease-free survival of colorectal cancer in the validation cohort. Kaplan-Meier curves of four risk groups for overall survival (A) and disease-free survival (B). Multivariate Cox analyses of the four risk groups for overall survival (C) and disease-free survival (D) adjusting for the significant clinicopathological factors in relation to overall survival (Table 4) and disease-free survival (Table 5). Abbreviations: TNM, Tumor-node-metastasis.

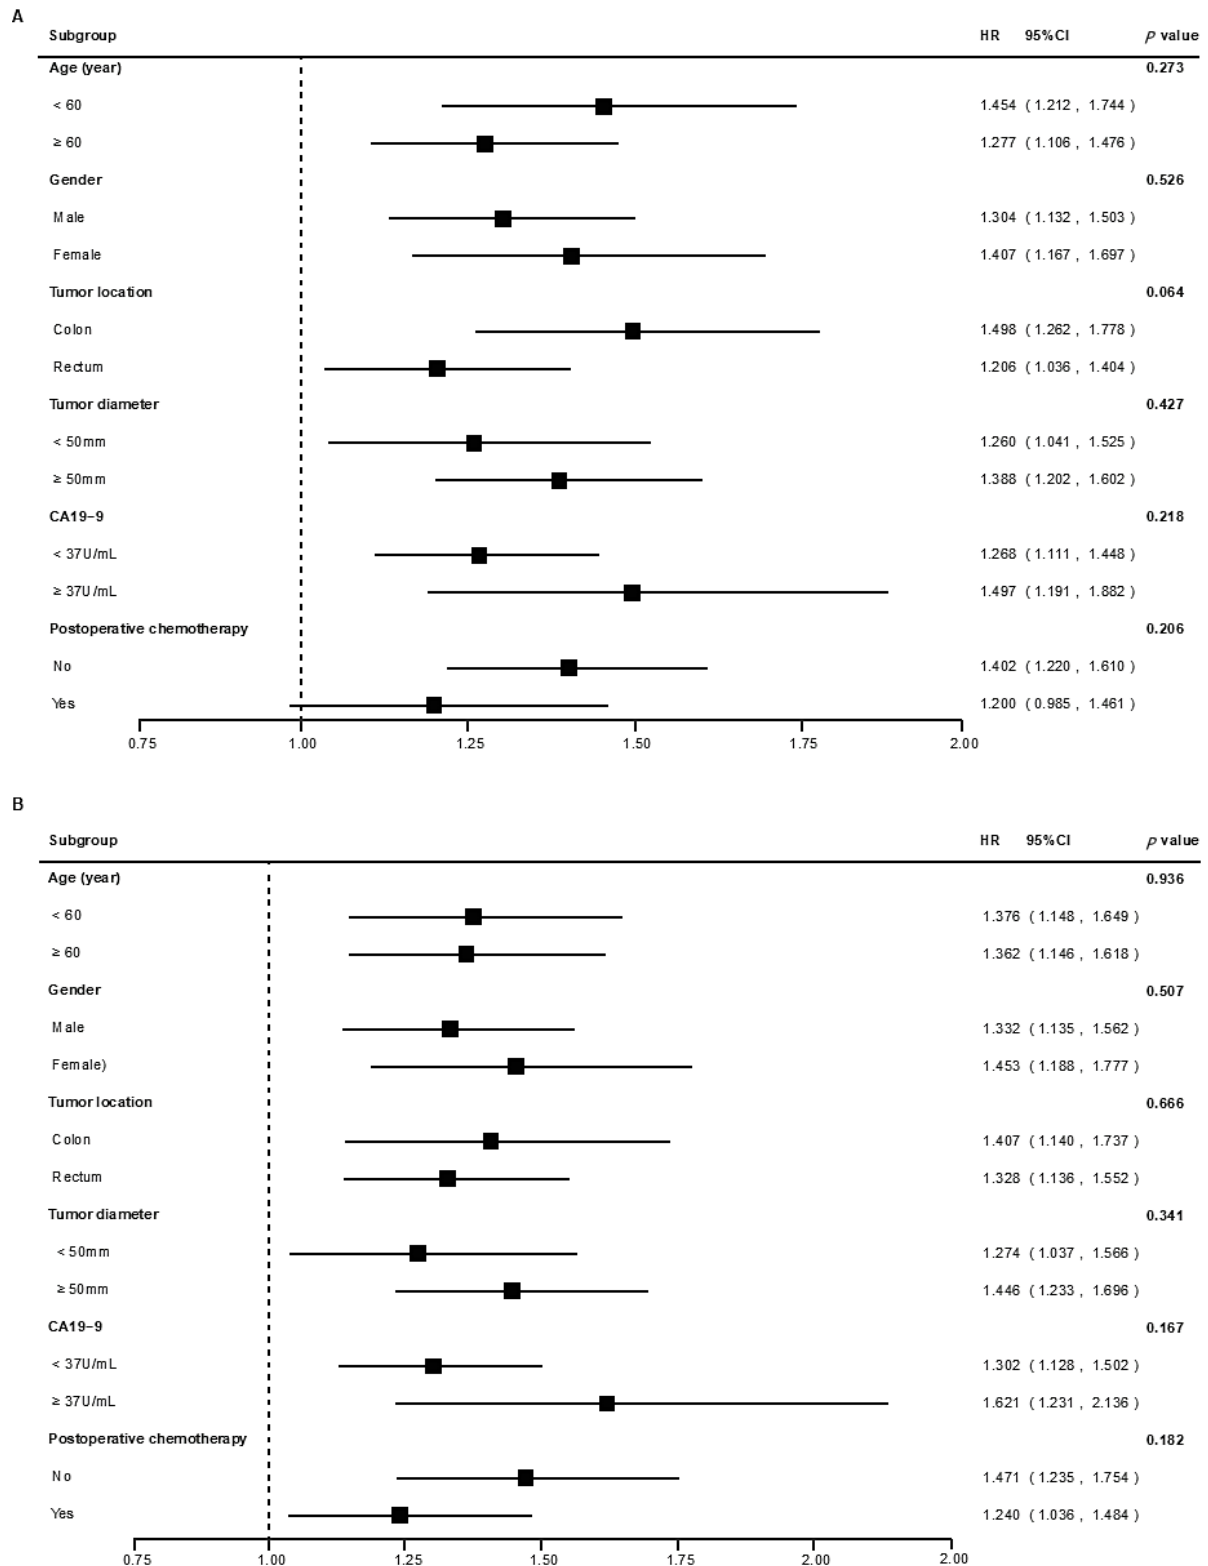

**Figure S6.** Subgroup analyses for the association of OS-P11 and DFS-P11 with the prognosis of colorectal cancer in the training cohort. Subgroup analyses were performed in colorectal cancer patients stratified by age, gender, tumor location, tumor diameter, CA19-9, and postoperative chemotherapy (no or yes) to assess the association between OS-P11 and overall survival (A); and the association between DFS-P11 and disease-free survival (B). All the analyses were adjusted for the significant clinicopathological factors in relation to overall survival (Table 2) and disease-free survival (Table 3). Abbreviations: HR, hazard ratio; CI, confidence interval.

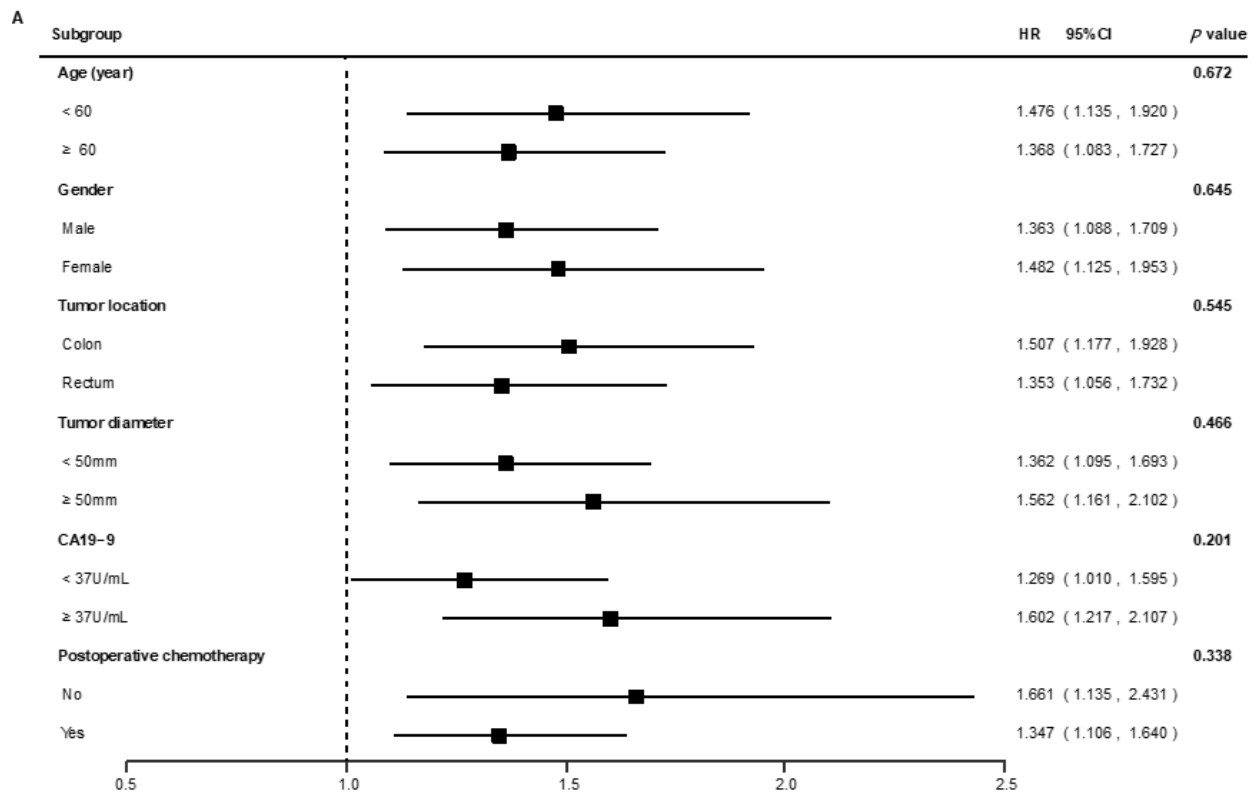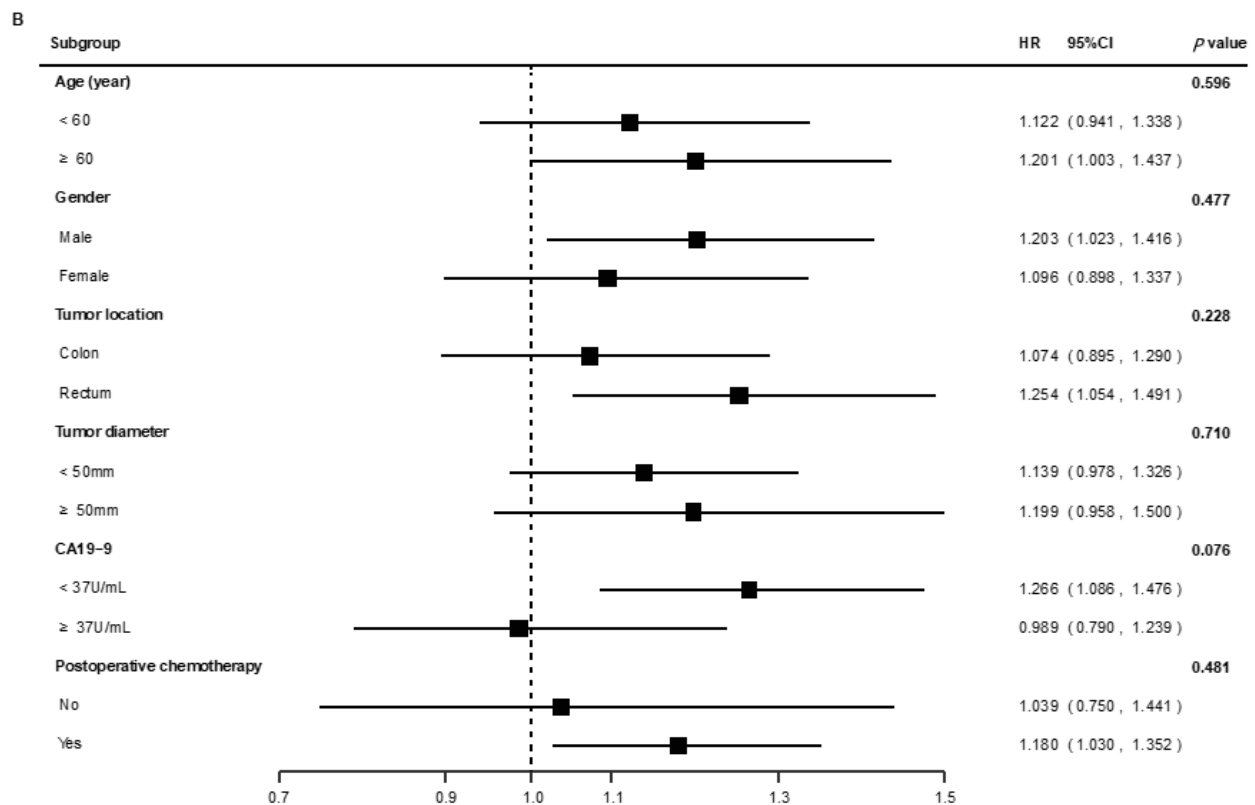

**Figure S7.** Subgroup analyses for the association of OS-P11 and DFS-P11 with the prognosis of colorectal cancer in the validation cohort. Subgroup analyses were performed in colorectal cancer patients stratified by age, gender, tumor location, tumor diameter, CA19-9, and postoperative chemotherapy (no or yes) to assess the association between OS-P11 and overall survival (**A**); and the association between DFS-P11 and disease-free survival (**B**). All the analyses were adjusted for the significant clinicopathological factors in relation to overall survival (Table 4) and disease-free survival (Table 5). Abbreviations: HR, hazard ratio; CI, confidence interval.

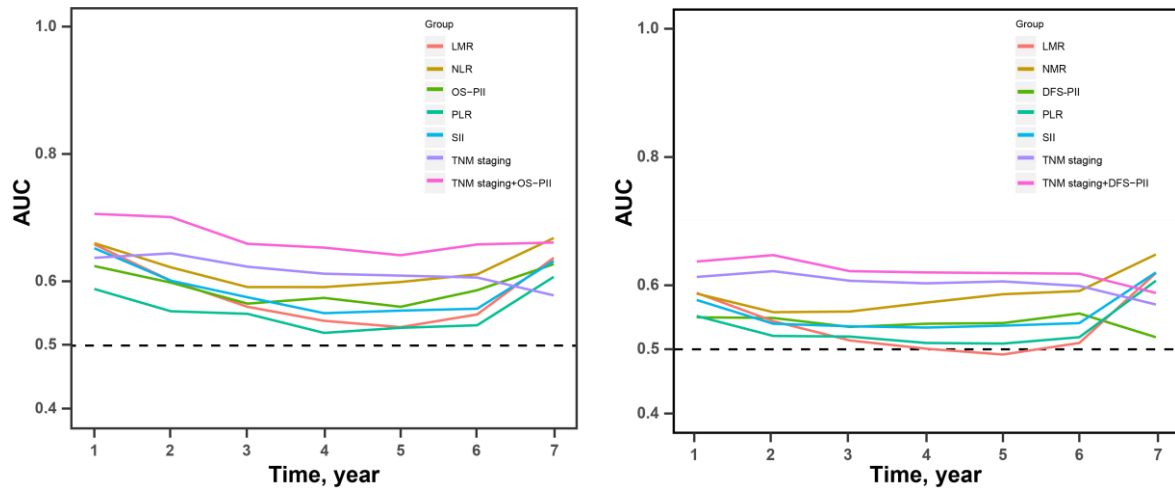

**Figure S8.** The time-dependent AUCs of PIIIs, TNM staging, a combination of PIIIs and TNM staging, NLR, PLR, LMR, and SII in the training cohort. Time-dependent AUCs presented the sequential trends of PIIIs, TNM staging, a model of PIIIs and TNM staging, NLR, PLR, LMR, and SII for overall survival prediction (A) and disease-free survival prediction (B). The horizontal axis represents the years after radical resection, and the vertical axis represents the estimated area under the ROC curves for survival at the time of interest. Abbreviations: TNM, Tumor-node-metastasis.

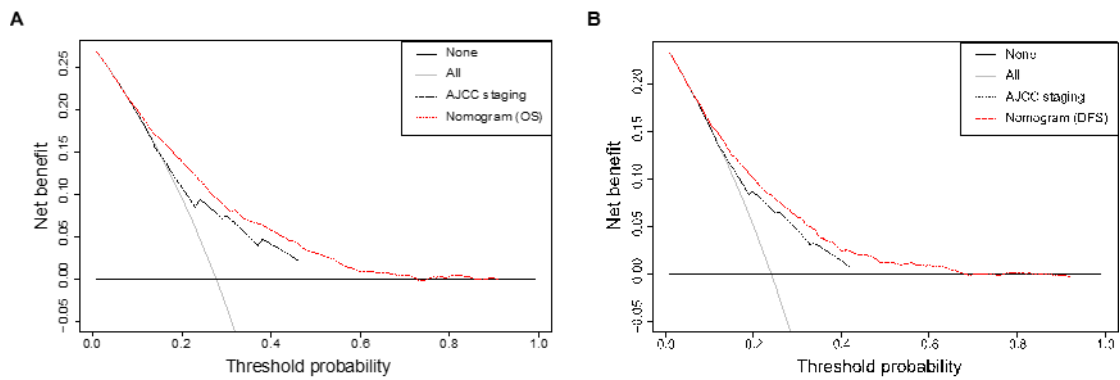

**Figure S9.** Decision curve analysis for 5-year overall survival prediction (A) and 5-year disease-free survival prediction (B) in the training cohort. Abbreviations: AJCC, American Joint Committee on Cancer.

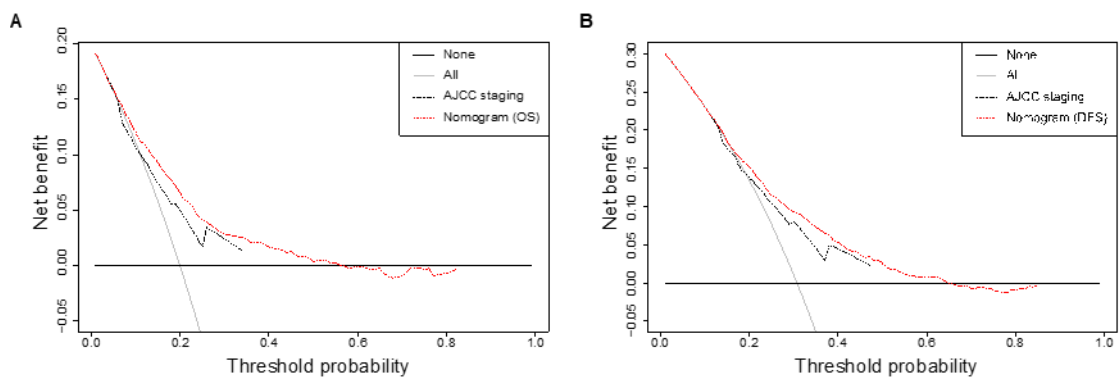

**Figure S10.** Decision curve analysis for 5-year overall survival prediction (A) and 5-year disease-free survival prediction (B) in the validation cohort. Abbreviations: AJCC, American Joint Committee on Cancer.
